# Supplementary material
Source: PubMed Central journal article supplement (PMC4183141)
Supplement: NIHMS630602-supplement-Supporting_Online_Material.pdf [file NIHMS630602-supplement-Supporting_Online_Material.pdf]

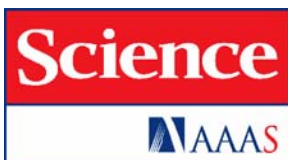

## Supporting Online Material for

### **Acetylation of Metabolic Enzymes Coordinates Carbon Source Utilization and Metabolic Flux**

Qijun Wang, Yakun Zhang, Chen Yang, Hui Xiong, Yan Lin, Jun Yao, Hong Li, Lu Xie,  
Wei Zhao, Yufeng Yao, Zhi-Bin Ning, Rong Zeng, Yue Xiong, Kun-Liang Guan, Shimin  
Zhao,\* Guo-Ping Zhao\*

\*To whom correspondence should be addressed. E-mail: zhaosm@fudan.edu.cn (S.Z.);  
gpzhao@sibs.ac.cn (G.Z.)

Published 19 February 2010, *Science* **327**, 1004 (2010)  
DOI: 10.1126/science.1179687

#### **This PDF file includes:**

Materials and Methods  
SOM Text  
Figs. S1 to S6  
Tables S1 and S2  
References

## Materials and methods

### Genetic Procedures

#### Bacterial Strains and Media

Bacteria strains, genes and vectors used in this study are listed in table S2. *Salmonella enterica* serovar typhimurium LT2 *galE* mutant G2466 (1) is kindly provided by Prof. Lei Wang of Nankai University, Tianjin, China. Glucose and Citrate growing media used in this study was prepared by using M9 minimal medium supplemented with Biotin (0.1 mM) and VB1 (0.05 mM) with concentrations of glucose or citrate presented as specified in individual study. Antibiotics supplementations in media as required are 100 µg/ml, 17 µg/ml and 50 µg/ml for ampicillin, chloramphenicol and kanamycin, respectively.

#### Molecular Cloning

Target genes used in this study were cloned from *S. enterica* G2466 genome by amplifying genomic DNA extracted by Easy-DNA kit (Invitrogen, Carlsbad, CA). Each cloned gene was confirmed by DNA sequencing.

Site-directed mutagenesis in this study was carried out by introducing desired mutations by PCR. Primers used are listed below with the introduced nucleotide mutations indicated by asterisks:

*gapA* K331Q

F-GATTGCTCACATCTCCC\*AACTCGAGCACCACC;

R-GGTGGTGCTCGAGTTG\*GGAGATGTGAGCAATC.

*aceA* K308Q

F-GATGCTATCCACGCGC\*AATATCCGGGCAAAC;

R-GTTTGCCCGGATATTG\*CGCGTGGATAGCATC.

**table S2 Bacterial strains and plasmids used in this study**

| Strains or Plasmids          | Genotype and Characteristics                                                                                                                                                              | References/Sources       |
|------------------------------|-------------------------------------------------------------------------------------------------------------------------------------------------------------------------------------------|--------------------------|
| <b>Strains</b>               |                                                                                                                                                                                           |                          |
| <b><i>S. enterica</i></b>    |                                                                                                                                                                                           |                          |
| G2466                        | serovar typhimurium LT2 <i>galE</i>                                                                                                                                                       | David Hone <i>et al.</i> |
| <i>pat</i> null mutant       | G2466 <i>pat::Cm</i>                                                                                                                                                                      | This study               |
| <i>cobB</i> null mutant      | G2466 <i>cobB::Cm</i>                                                                                                                                                                     | This study               |
| <i>cobB/pat</i> null mutant  | G2466 <i>cobB::Kan, pat::Cm</i>                                                                                                                                                           | This study               |
| <b><i>E. coli</i></b>        |                                                                                                                                                                                           |                          |
| DH5 $\alpha$                 | F $\bar{\phi}$ 80d <i>lacZ</i> $\Delta M(lacZYA-argF)$ U169 <i>deoR</i><br><i>recA1 endA1 hsdR17</i> ( $r_k^- m_k^-$ ) <i>supE44</i> $\lambda^-$ <i>thi</i><br>$\bar{gyr96}$ <i>relA1</i> | Invitrogen               |
| BL21(DE3)                    | F $\bar{\phi}$ <i>ompT</i> $r_B^- m_B^-$ ( $\lambda$ DE3)                                                                                                                                 | Novagen                  |
| <b>Plasmids</b>              |                                                                                                                                                                                           |                          |
| pET-22b(+)                   | Expression vector for <i>E. coli</i>                                                                                                                                                      | Novagen                  |
| pET-22- <i>gapA</i>          | pET-22b(+) based <i>gapA</i> expression clone                                                                                                                                             | This study               |
| pET-22- <i>aceA</i>          | pET-22b(+) based <i>aceA</i> expression clone                                                                                                                                             | This study               |
| pET-22- <i>aceK</i>          | pET-22b(+) based <i>aceK</i> expression clone                                                                                                                                             | This study               |
| pET-22- <i>cobB</i>          | pET-22b(+) based <i>cobB</i> expression clone                                                                                                                                             | This study               |
| pET-22- <i>pat</i>           | pET-22b(+) based <i>pat</i> expression clone                                                                                                                                              | This study               |
| pET-22- <i>icdA</i>          | pET-22b(+) based <i>icdA</i> expression clone                                                                                                                                             | This study               |
| pET <i>tac</i>               | The P <sub>T7</sub> of pET-22b(+) replaced by P <sub>tac</sub> for<br>expression in <i>S. enterica</i>                                                                                    | This study               |
| pET <i>tac</i> - <i>gapA</i> | pET <i>tac</i> based <i>gapA</i> expression clone                                                                                                                                         | This study               |
| pET <i>tac</i> - <i>aceA</i> | pET <i>tac</i> based <i>aceA</i> expression clone                                                                                                                                         | This study               |
| pET <i>tac</i> - <i>aceK</i> | pET <i>tac</i> based <i>aceK</i> expression clone                                                                                                                                         | This study               |

|                           |                                                         |                              |
|---------------------------|---------------------------------------------------------|------------------------------|
| pET <i>tac-gapA</i> K331Q | pET <i>tac</i> based <i>gapA</i> K331Q expression clone | This study                   |
| pET <i>tac-aceA</i> K308Q | pET <i>tac</i> based <i>aceA</i> K308Q expression clone | This study                   |
| pKD46                     | $\lambda$ RED recombination helper plasmid              | Datsenko, K.A. <i>et al.</i> |
| pKD3                      | Template plasmid containing <i>Cm</i> resistant gene    | Datsenko, K.A. <i>et al.</i> |
| pKD4                      | Template plasmid containing <i>Kan</i> resistant gene   | Datsenko, K.A. <i>et al.</i> |

---

### Construction of *S. enterica* Mutants

*S. enterica* gene deletion mutants were constructed by the method described previously (2):

A pair of primers with 50-nt extensions complementary to the regions immediately adjacent to the targeted gene of deletion and 20-nt extensions complementary to the region immediately adjacent to the antibiotic resistant gene flanked by FRT (FLP recognition target) sites was made. The antibiotic resistant gene carrying plasmid pKD3 or pKD4 (table S2) was used as templates for PCR amplification of the knock-out cassette with Invitrogen PCR Kit (Invitrogen, Carlsbad, CA). The PCR products were recovered by using QIAquick Gel Extraction Kit (QIAGEN, Frankfurt, Germany) and then transformed into the electrocompetent *S. enterica* G2466 carrying the helper plasmid pKD46 via electroporation by using MicroPulser electroporator (Bio-Rad, Hercules, CA) and 1.0 cm corvette according to the manufacturer's instructions. Pulsed cells were rescued with 0.8 ml SOC medium, incubated at 30 °C for 1 h and 20 h at room temperature before spread onto agar with

incubation at 37 °C to select for *Cm*<sup>R</sup> or *Kan*<sup>R</sup> transformants.

Multiple gene disruption was achieved by repeating above procedures consecutively and use different selection markers. *cobB* or/and *pat* deletions were verified by PCR.

The primers for constructing the deletions are as following:

For *cobB* deletion:

F-GCAGGTGGGATGCGCGGTGCTGCTTTTTTACATCTTACCGACTAATCA  
AGTGTAGGCTGGAGCTGCTTC;  
R-AGCCAAAGCGCCTGTCTGGGCCTACAGATGAACGTAACGTGAAATGTA  
GGCCATATGAATATCCTCCTTA.

For *pat* deletion:

F-ACGCGCTATCTGGCAGGAAAACGCAACATCCGGGAAACGTCACAGC  
ATAGTGTAGGCTGGAGCTGCTTC;  
R-GTCCTCTGTGCTATGCAGACGACATAAGCGAGCAATAATAACATCAGT  
ACCATATGAATATCCTCCTTA.

Success of deletion of *pat* and *cobB* were verified by PCR using following primers:

*cobB*: F-CATGTTGAGCGCTATCTGGA; R-AGGTCGCCAATGATAAGTCG;

*pat*: F-TGAACATTTACCCGTTTCA; R-GAGTTGGCAAGGTGTTGTT.

### **q-RT-PCR**

Cells at various growing phase as indicated were harvested by centrifuging at 8,000 × *g* for 10 min at 4 °C. Total RNA was extracted immediately after harvesting by TRIZOL (GIBCO, USA). Reverse transcription was carried out using the reverse transcription kit (Promega, Madison, WI). The cDNA

samples were diluted between 1:10 ~1:100 to ensure obtaining linearly signaling. Samples were run in triplicate on ABI PRISM 7000 Sequence Detection System (Applied Biosystems), SyberGreen (Applied Biosystems) was used as probe. The primers used to quantify gene expression were:

*cobB*: F-CCTTTGGGAAGAGCATCG;  
R-GCCGCATTGGGTTGTATTT;  
*pat*: F-TCGCACAGGTCACCAAAGA;  
R-CGCACCAATACGGCAAA;  
16SrRNA: F-TGGAAAGTTCTGTGGATGTCA;  
R-AAAGCGTGGGGAGCAAA.

The PCR reactions were carried out under the following conditions: 95 °C for 1 min, 95 °C 15 s, 62 °C 15 s, and 72 °C 30 s for 40 cycles. SyberGreen real time PCR dissociation curves showed that each primer set gave a single and specific product. The efficiency, sensitivity and linearity of RT-PCR reactions were examined. The relationship between threshold cycle (Ct) and the log copy number of cDNA for all genes was linear with an R<sup>2</sup>, The amplification efficiency, shown as following, of real time PCR is monitored to ensure validity of quantification results:

|                          | 16S rRNA | <i>cobB</i> | <i>pat</i> |
|--------------------------|----------|-------------|------------|
| R <sup>2</sup>           | 0.9975   | 0.9997      | 0.9978     |
| Amplification efficiency | 95%      | 98%         | 97%        |

Statistical analysis was performed using the Statview Statistical package (version 5.0.1). Values of P<0.05 were considered statistically significant.

## **The Growth Properties of *S. enterica***

In all experiments, 17 µg/ml chloramphenicol was supplemented to media that grow *cobB* null or *pat* null mutant strains, 50 µg/ml kanamycin was supplemented to media that grow *cobB/pat* double null strain. *S. enterica* G2466 and its derivative strains were first grown overnight in 20 ml LB medium to reach saturation. Cells were harvested by centrifuging at 8,000 × *g* for 10 min and washed with fresh M9 medium for three times. Certain amount of re-suspended ( 2 ml M9 medium) cells were inoculated into 50 ml fresh M9 medium with indicated carbon source to ensure the initial O.D.600=0.100 in a 250 ml flask. Cells were grown at 37 °C with shaking (220 r.p.m.). Cell growth was measured by taking O.D.600 at time points specified by using Bio-photometer (Eppendorf, Hamburg, Germany). Cuvette chamber was kept at 37 °C while measuring and O.D.600 readings were taken immediately after samples were taken.

## **Proteomics Screen for Acetylated Proteins**

### **Protein Extraction**

*S. enterica* cells grown under various carbon sources were harvested at mid-log phase by centrifuging at 8,000 × *g* for 15 min. Cells were disrupted by sonication on ice in PBS buffer (pH7.5). Soluble proteins were obtained by collecting supernatant after centrifugation of broken cell suspension at 20,000 × *g* for 40 min at 4 °C. Proteins were precipitated by adding ice-cold acetone to a final concentration of 85%. The protein pellet was washed by 80% ice-cold acetone two times and vacuum dried.

## **Digestion, Peptide Enrichment and MS Analysis**

1. Dried protein pellets were reconstituted in 100 mM ammonium bicarbonate and protein concentrations was determined by Bio-Rad protein assay solution (Bio-Rad, Hercules, CA). Proteins were digested with trypsin overnight with gentle shaking at 37 °C with a trypsin/protein ratio of 1/50. After overnight digestion, additional trypsin was added to the digestion mixture with a trypsin/protein ratio of 1/500 and incubated at 37 °C for another 3-4 hours. The trypsin in the digestion reaction was inactivated by heating at 99 °C for 5 min. The solution was cleared by centrifuging at 10,000 × *g* on desktop centrifuge, solution was vacuum dried two times to remove bicarbonate salts.

2. Anti-acetyllysine antibody was conjugated to protein A beads (Santa Cruz, CA) by mixing 100 µl antiserum (home made) with 50 µl protein A beads in 500 µl pH 7.5 PBS. Conjugated beads were washed by pH 7.5 PBS three times after the conjugation was carried out at 4 °C for 3 hours with gentle shaking.

3. Trypsin digested peptide mixture from step 1 was reconstituted in NETN buffer (0.5% NP40, 1 mM EDTA, 50 mM Tris [pH 8.0], 100 mM NaCl). Conjugated antibody was added to the solution and incubated at 4 °C for 3-5 hours. Supernatant was removed by carefully washing beads by ETN (1 mM EDTA, 50 mM Tris [pH 8.0], 100 mM NaCl) buffer three times.

4. The bound peptides were eluted by 0.1% trifluoroacetic acid.

5. The resulting peptides were assayed by continuously separated by SCX followed by C18 columns (Dionex, Sunnyvale, CA) before being subjected to MS/MS analysis in an LTQ-Orbitrap mass spectrometer (Thermo Electron,



Bremen, Germany).

6. The MS data were initially searched against the NCBI database with the aid of the Sequest search engine. Searches for acetylated peptides were done against *S. enterica* proteins database by first allowing only singly charged fragments followed by allowing both singly charged and multiply charged fragments. To collect positive hits, the following selection thresholds were applied: mass accuracy: 5 ppm, delta cn: 0.1, primary score: 200, rsp: 5, those peptides having scores (XC) above 1.5, 2.0 and 2.5 for ion charges at +1, +2 and +3 and higher were automatically selected as positives identification. Peptides with marginal scores were under manual spectra examination to be included in the positive list. The data from three experiments were combined. Positive hits from both searches were then combined but marked differently.

**SILAC Quantification.**  $^{15}\text{N}$  labeled *S. enterica* cells were obtained by growing cells in  $^{15}\text{NH}_4\text{Cl}$  containing minimal medium without adding other nitrogen source. The  $^{15}\text{N}$  labeling efficiency reached 99.6% by MS analysis after three rounds of inoculation. Proteins of  $^{15}\text{N}$  labeled cells and unlabeled cells were obtained by sonication, followed by acetone precipitation and vacuum drying. Equal amount (0.5mg) of labeled and unlabeled proteins were mixed and subject to trypsin digestion for 20 hours at protein/trypsin ratio of 50/1, resulted peptides were vacuum dried and re-dissolved in 100  $\mu\text{l}$  MS buffer (10% acetonitril v/v, 0.5% formic acid w/v). 50 $\mu\text{l}$  of the peptides sample was subject to nano-LC/LTQ-Orbitrap MS/MS Analysis. Quantification of acetylated peptides was achieved by adapting published methods (3, 4): the resulted MS/MS spectra was searched against NCBI *S. enterica* library by

Sequest searching engine, with presettings of either only  $^{14}\text{N}$  or  $^{15}\text{N}$  present in the peptides. The acetylated peptides were extracted and those were previously identified by enrichment procedures were used to quantify the acetylation level changes of corresponding proteins. The chromatographic mass peaks of the identified both  $^{14}\text{N}$  and  $^{15}\text{N}$  acetylated peptides were extracted, and the peak areas were calculated using the PepQuan module in Bioworks (Thermo Electron, San Jose, CA). Chromatographic peak extraction and area integration were performed using a mass tolerance of 1.5 amu, minimum threshold of 1,000, and peak smoothing point of 5. The peak area ratio of each pair of  $^{14}\text{N}$  and  $^{15}\text{N}$  acetylated peptide was calculated normalized to the ratio of one none acetylated ribosomal protein 50S L6 peptide: DGYADGWAQAGTAR. Average of ratios in 3 different runs of the same pair of acetylated peptides was reported.

## **Metabolic Flux Measurements.**

### **$^{13}\text{C}$ labeling experiment**

All *Salmonella enterica* LT2 strains were pre-cultured on LB medium to late-exponential growth phase and washed twice with carbon source free M9 minimal medium. The labeling cultures were started at O.D.600~0.1 and grown at 37°C in triplicates in 20 ml of M9 minimal medium supplemented with 20% (w/w) mixture of both labeled and unlabeled glucose or citrate as carbon source. 20% (w/w) uniformly  $^{13}\text{C}$ -labeled glucose (U- $^{13}\text{C}$ , >99%; Cambridge

Isotope Laboratories, Andover, MA) and 80% (w/w) unlabeled glucose, or 20% of  $^{13}\text{C}_6$ -labeled citrate (SIGMA) and 80% (w/w) unlabeled citrate was added. Cell growth was monitored spectrophotometrically at 600nm. Cell samples were taken at mid-exponential-growth phase (O.D.600 of  $\sim 0.4$ ) for either glucose depletion assay or GC-MS analysis.

### **GC-MS sample preparation and analysis.**

Cells growing at mid-exponential-growth phase from 5 ml culture were harvested by centrifugation. The cell pellet was washed with 1 ml 0.9% (w/vol) NaCl and then hydrolyzed in 200  $\mu\text{l}$  of 6 M HCl at 105°C for 24 h. The filtrate of hydrolysate was dried in a heating block at 60°C, and proteinogenic amino acids were derivatized at 85°C for 1 h in 75  $\mu\text{l}$  tetrahydrofuran (Sigma) and 75  $\mu\text{l}$  *N*-methyl-*N*-[tert-butyldimethylsilyl] trifluoroacetamide (Sigma). After filtration, 2  $\mu\text{l}$  of derivatized sample was assayed in an Agilent 6890-5973 GC/MS. The mass spectral data were obtained for fragments of most derivatized amino acids. Prior to analysis of cellular metabolites, the raw mass isotopomer distribution vector (MDV) was corrected for the natural isotope abundances of carbon atoms introduced from the derivatization reagent and all non-carbon atoms involved in the whole fragment (5). Citrate was quantified by high-pressure liquid chromatography with an Agilent model 1100 instrument (Agilent, Santa Clara, CA) equipped with Shodex RSpak KC-811 (8 x 300 mm; Shodex Inc., Tokyo, Japan) and an Agilent DAD detector. A mobile phase

consisting of 6 mM HClO<sub>4</sub> at a flow rate of 1.0 ml/min was used, and the column was operated at 50°C.

#### **Glucose depletion (glycolytic) assay.**

Cells growing at mid-exponential-growth phase (O.D.600 around 0.4) from 5 ml culture, started at the same glucose concentrations and cell densities, were harvested by centrifugation. Culture medium was saved and the glucose level remained in culture medium was determined using commercial enzymatic assay kits (R-Biopharm AG, Darmstadt, Germany). The depletion of glucose was determined by comparing difference of initial medium glucose concentration and final concentration in the culture medium.

#### **Analysis of flux ratios and flux distributions.**

The GC-MS-derived mass isotope distributions were analyzed as previously described (5). In brief, from the mass distributions of the amino acids the <sup>13</sup>C labeling patterns of their respective precursor molecules in central metabolism were inferred. A set of probabilistic equations and the mass distributions of selected metabolite fragments were then combined to calculate the relative contribution of individual pathways to the formation of a given metabolite.

Intracellular fluxes were estimated by fitting a flux distribution to the above flux ratios and quantitative physiological data within a stoichiometric model described previously for *E. coli* (6). Precursor requirements for biomass formation were taken from previous described (6). The sum of the weighed

square residuals of the constraints from both metabolite balances and flux ratios was calculated and the residuals were weighed by dividing through the experimental error ( $\chi^2$  value). Through an iterative process of data fitting, a flux solution corresponding to the minimal  $\chi^2$  value was sought. To ensure the global error minimum of the flux solution, multiple calculations were performed from different random starting points, and the best solution that was reproducibly attained was presented as the estimated result of flux distribution.

## **Biochemical Procedures**

### **Protein Expression and Purification**

To express proteins in *E. Coli*, pET-22b(+) system was employed. To express proteins in the *S. enterica* G2466 and its derived mutant strains, the vector pET-22b(+) was engineered by changing T7 promoter to *tac* promoter without changing the vector backbone (pET*tac*, table S2). The protein was expressed in and purified from *S. enterica* according to the protocol in *E. coli*. All the constructed expression plasmids were introduced individually into *E. coli* BL21(DE3) or into *S. enterica* strains and the transformed strains were grown in LB medium containing 100  $\mu\text{g/ml}$  ampicillin at 37 °C. IPTG was added to a final concentration of 0.5 mM when O.D.600 reading reached 0.6-0.8. The induction was carried out at 20 °C for 3-4 h. The cells were harvested by centrifugation and cell pellet was suspended in ice-cold PBS buffer (0.1 M Sodium Phosphate, 0.15 M NaCl, pH 7.0) containing 1.0 mM

pheylmethylsulfonyl fluoride (PMSF) and 0.5 mM DTT. Cells were disrupted by using the Cell Ultrasonic System (Sonics & Materials INC. Newtown, CT. USA) with short bursts of 10 s followed by intervals of 30 s for cooling until cell suspension becomes clear. Unbroken cells and cell debris were removed by centrifuging at  $21,000 \times g$  for 40 min at 4 °C. The supernatant was supplemented with 20 mM imidazole, loaded onto Nickel resin column (GE Healthcare) and purified with ÄKTA™ FPLC™ System (GE Healthcare, Piscataway, NJ). After washed with 10 volume binding buffer A (20 mM Sodium Phosphate, 500 mM NaCl and 20 mM Imidazole, pH 7.5), proteins were eluted by elution buffer (20 mM Sodium Phosphate, 500 mM NaCl and 500 mM imidazole, pH 7.5). The purity of proteins was checked by SDS-PAGE before shock-frozen storing at -80 °C.

**Pat-mediated *in vitro* acetylation** was modified from published method (7).

The *in vitro* acetylation reaction was performed in the buffer containing 50 mM Tris-HCl (pH 8.0), 0.1 mM EDTA, 10% glycerol, 1 mM dithiothreitol and 10 mM sodium butyrate. The acetylation was carried out by adding 10 µg of Pat, 0.2 mM acetyl-CoA in a volume of 100 µl. Reaction mixtures were completely mixed and incubated at 37 °C for two hours. The acetylated protein was used directly for assay or precipitated out for re-deacetylation.

**CobB-mediated *in vitro* deacetylation** was modified from the method described elsewhere (8). The *in vitro* deacetylation reaction was performed in buffer contains 40.0 mM HEPES (pH 7.0), 6.0 mM MgCl<sub>2</sub>, 1.0 mM NAD<sup>+</sup>, 1.0

mM dithiothreitol and 10 % glycerol. Substrate proteins (10 µg), CobB (10 µg) and reaction buffer were incubated at 37 °C in a total volume of 100 µl. The de-acetylated protein was used directly for assays or precipitated out for re-acetylation.

**AceA assay** was followed by publicized method (9). All procedures were carried out at 30 °C and the reaction mixture for the LDH-coupled assay contains, in a final volume of 1 ml of 40 mM HEPES (pH 7), 6.0 mM MgCl<sub>2</sub>, 4.0 mM threo-D,L isocitrate, 0.28 mM NADH and 45 units lactate dehydrogenase (Sigma, St. Louis, MO). NADH oxidation is monitored spectrophotometrically at 340 nm (F-4600, Hitachi Corp., Japan).

**GapA glycolytic assay** was carried out by following method described elsewhere (10). The reaction was carried out at 30 °C by adding of sample to substrate solution containing 100 mM Tris/HCl (pH 8.5), 1.5 mM NAD<sup>+</sup>, 5.0 mM sodium phosphate and 3.2 mM D-glyceraldehydes-3-phosphate, absorbance change at 340 nm was monitored.

**GapA gluconeogenic assay:** The formation of GapA's gluconeogenesis substrate, 1, 3-diphosphoglycerate, was generated by published method (11). The reaction mixture composed of 80mM triethanolamine (pH 8.5), 8.0 mM MgSO<sub>4</sub>, 0.25 mM NADH, 2.4 mM ATP, 12 mM 3-phosphoglycerate and 200 pg/ml glyceraldehyde-3-phosphate dehydrogenase. The reaction was stopped by heating at 99<sup>0</sup>C for 5 min after the reaction was allowed to proceed at 37<sup>0</sup>C for half hour. To initiate gluconeogenesis reaction, 0.1 mM NADH

and 10 ng GapA protein were added to the solution and the decrease in NADH was monitored spectrophotometrically at 340 nm (F-4600, Hitachi Corp., Japan) at 30°C.

**AceK assay** was carried by coupling AceK activity to ICDH activity as described elsewhere (12). The phosphorylation reaction system contains 40.0 mM HEPES (pH7.0), 1.0 mM ATP, 2.0 mM MgCl<sub>2</sub>, 10.0 µg ICDH and AceK, respectively. After incubating at 37 °C for one hour, the activity of ICDH was detected spectrophotometrically by monitoring the reduction of NADH at 340 nm with 40.0 mM HEPES (pH7.0), 2.0 mM threo-D,L isocitrate, 0.5 mM NAD<sup>+</sup>, 2.0 mM MnCl<sub>2</sub>, 0.5 µg ICDH in the reaction system.

**Protein concentrations** were determined by using the Bradford protein assay reagent (Bio-Rad, Hercules, CA) with known concentration of bovine serum albumin (BSA) as control per the manufacturer's instructions.

**Western blotting:** For normal western blotting, standard western blotting procedures were followed. For acetylation western blotting, 50 mM Tris (pH 7.5) with 10% (V/V) Tween-20 and 1% peptone (Amresco, Solon, Ohio) was used for blocking and 50 mM Tris (pH 7.5) with 0.1% peptone was used to prepare primary and secondary antibodies.



S1A

Pat 809 EFAVLVRS<sup>+</sup>DLKGLGLGRRLMEKLIAYTRDHGLKRLNGITMPNNRGMVALARKLGFQVDIQL 869  
 E +V V +G GLGR+L+ +LI R G + N + L LGF V Q+

YncA 82 EHSVYVHPAHQ<sup>+</sup>GKGLGRKLLSRLIDEARRCGKHMVAGIESQNAASIRLHHS<sup>+</sup>LGFTVTAQM 142

Pat 810 FAVLVRS<sup>+</sup>DLKGLGLGRRLMEKLIAYTRDHGLKRLNGITMPNNRGMVALARKLGFQ 864  
 F + V D + GLGR L+E LI G+ L +N +AL LGF

RimI 67 FNIAVDPDFQRRGLGRMLLEHLIDELETRGVVTLWLEVRASNA<sup>+</sup>AIALYESLGFN 121

Pat 818 LKGLGLGRRLMEKLIAYTRDHGLKRLNGITMPNNRGMVALARKLGFQ 864  
 ++G GL ++L + + R+ G KR T R +AL +LGF+

YjgM 99 IRGQGLAKKLALMALDHAREQGFKRCYLETTAFLREAIALYERLGF 145

Pat 808 AEF<sup>+</sup>AVLVRS<sup>+</sup>DLKGLGLGRRLMEKLIAYTRDHGLKRLNG-----ITMPNNRGMVALARKLGFQVDIQL 869  
 AEF +++ + +G GL R + D+G LN I N + + RKLGF+V+ +L

SpeG 84 AEFQIIISPEYQ<sup>+</sup>GKGLASRAAK----LAMDYGFTVLNLYKLYLIVDKENEKAIHIYRKLGF<sup>+</sup>VEGEL 146

S1B

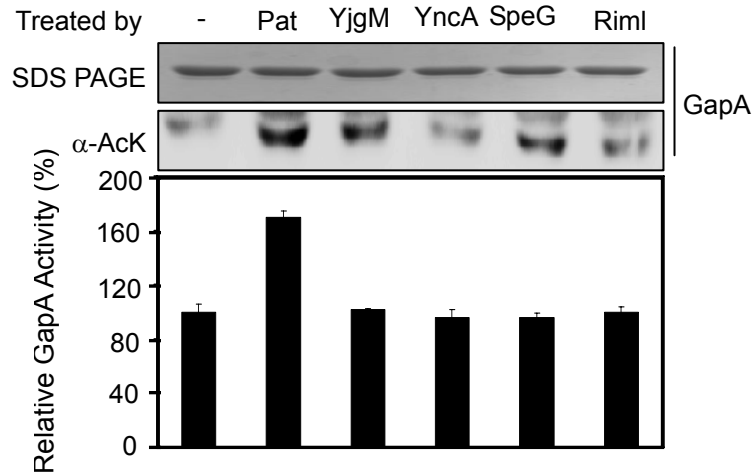

**fig. S1. Pat and CobB are major acetyltransferase/ deacetylase in *S. enterica* that catalyze the reversible lysine acetylation for metabolic enzymes. (S1A) Pat homologous proteins identified from the genome of *S. enterica*.** Amino acids sequences of bacteria acetyltransferase Pat, human acetyltransferases (GCN5, PCAF, CBP/P300, Elp3, Hat1, Tip 60), bacteria deacetylase CobB and human NAD<sup>+</sup> dependent deacetylases (Sirt1-7) were subject to Blast search in *S. enterica* genome in NCBI. No homology was found for Sirts and CobB, however, NP\_460549.1 (putative acyltransferase, YncA), NP\_463414.1 (ribosomal protein alanine acetyltransferase, RimI), NP\_46333.1 (putative acetyltransferase, YgjM) and NP\_460462.1 (spermidine N1-acetyltransferase, SpeG) showed similarities to Pat catalytic domain. **(S1B) Candidate acetyltransferases from *S. enterica* other than Pat do not affect the GapA activity.** Proteins share homology to Pat catalytic domain were cloned, expressed and purified to homogeneity. Their acetyltransferase catalytic activity toward metabolic enzymes was tested *in vitro* by using purified GapA, AceA and AceK as substrates. Similar results were obtained for all three proteins, but only the representative results of GapA are shown. SpeG and YgjM showed weak acetyltransferase activity. Unlike acetylated by Pat, GapA acetylated by SpeG, YncA and YgjM did not cause detectable changes in its catalytic activity.

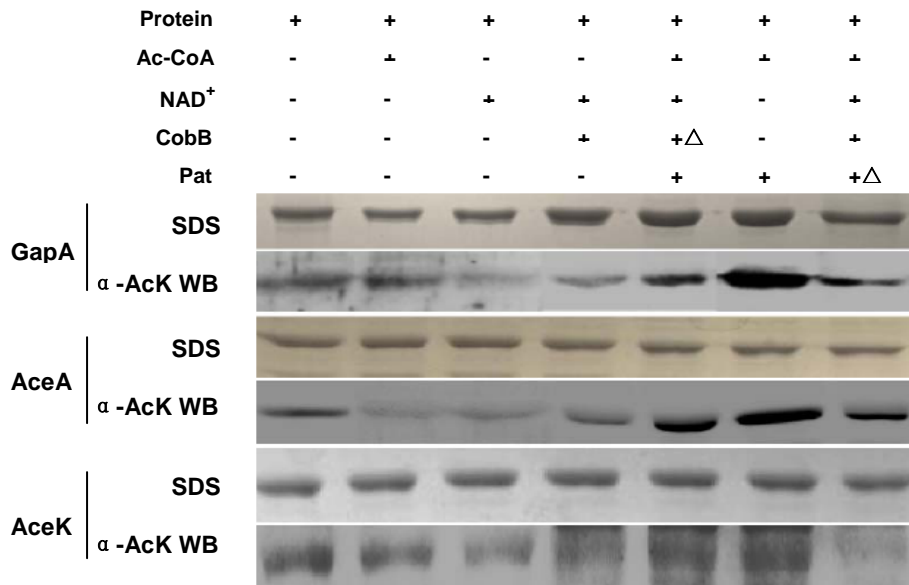

**fig. S2. Pat acetylates and CobB deacetylates metabolic enzymes *in vitro*.** Prototype strain expressed and purified GapA, AceA and AceK proteins were subject to *in vitro* acetylation by Pat and *in vitro* deacetylation by CobB. Resulted protein acetylation levels were probed by anti-acetyllsine Western blotting.  $\Delta$  indicates either re-acetylation after deacetylation or re-deacetylation after acetylation.

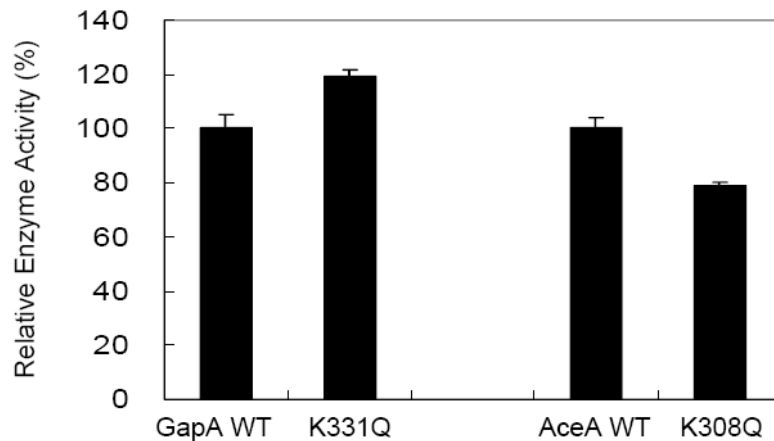

fig. S3. **GapA and AceA acetylation mimetic mutations made at the identified acetylation sites changed their catalytic activities.** *S. enterica* GapA K331Q mutant, AceA K308Q mutant were expressed and purified to homogeneity. The specific activity of each enzyme was determined and compared to their wild type counter parts expressed and purified by the same protocol. Mean values of triplicate assays with SD are shown. Specific activities for wild type enzymes are arbitrarily set as 100%.

Wang et al, fig. S3

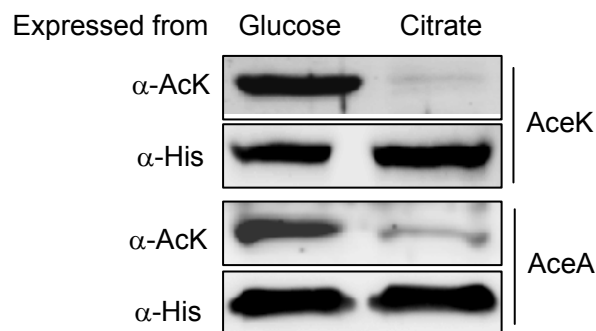

fig. S4. **AceA and AceK expressed from cells grow on glucose has higher acetylation level than those grow on citrate.** His tagged AceA and AceK proteins were expressed from *S. enterica* prototype strain grow in M9 minimal medium with either 50 mM glucose or 50 mM citrate as carbon source. Proteins were each purified by nickel column and the acetylation level of each purified protein was probed by anti-acetyllysine antibody.

S5A

|                    |   |   |   |   |   |                  |
|--------------------|---|---|---|---|---|------------------|
| ICDH               | + | + | + | + | + | First Treatment  |
| AceK               | - | + | + | + | + |                  |
| ATP                | - | - | + | + | + |                  |
| Acetylated-AceK    | - | - | - | - | + | Second Treatment |
| De-acetylated-AceK | - | - | - | + | - |                  |

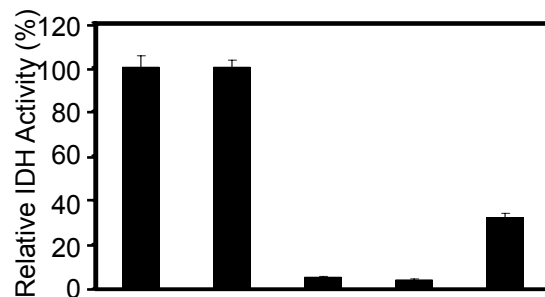

S5B

|          |   |   |   |   |                  |
|----------|---|---|---|---|------------------|
| ICDH     | + | + | + | + | First Treatment  |
| AceK     | - | + | + | + |                  |
| ATP      | - | + | + | + |                  |
| AceK K3Q | - | - | - | + | Second Treatment |
| AceK K3R | - | - | + | - |                  |

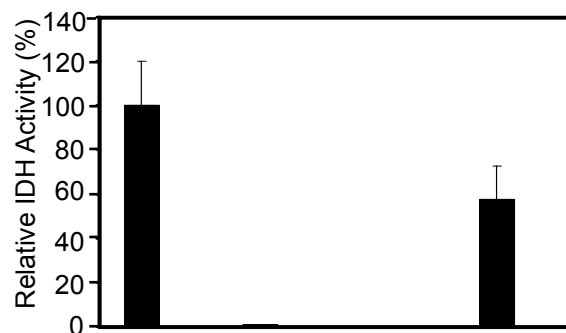

S5C

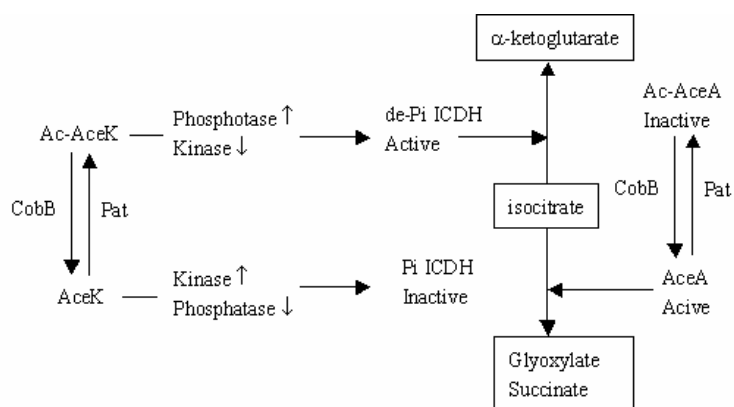

**fig. S5. Acetylated AceK has activated phosphatase activity. (S5A)**  
**Acetylated AceK activates phosphorylated ICDH.** Purified *S. enterica* ICDH (encoded by *icdA*) protein was first phosphorylated by AceK for 30 min., the resulted protein, precipitated by ammonium sulphate, was then incubated with either CobB de-acetylated AceK or Pat acetylated AceK at 37 °C for 1 hour. Relative specific ICDH activities after each treatment were then determined. Untreated ICDH activity was set as 100% and the average value of triplicate assays with SD were shown. **(S5B) Acetylation mimetic AceK mutation activates phosphorylated ICDH.** Purified ICDH protein was first co-incubated with ATP and AceK to inactivate ICDH, acetylation mimetic triple mutation (lysine72, 83 and 553 all changed to glutamine, designated as AceK K3Q) and none acetylation mimetic triple mutation (lysine72, 83 and 553 all changed to arginine, designated as AceK K3R) was then added and incubate for 30 minutes before each specific ICDH activity was measured, respectively. AceK untreated activity was set as 100% arbitrarily and the average value of triplicate assays with SD were shown. These results indicates that acetylation of AceK may have activated phosphatase activity. **(S5C) Schematic rationale for assaying the biochemical effect of reversible acetylation of AceK against its activity towards inhibition/activation of activity of ICDH via reversible phosphorylation.** The effect of reversible acetylation of AceA against its isocitrate lyase activity is also shown.

Wang et al, fig. S5

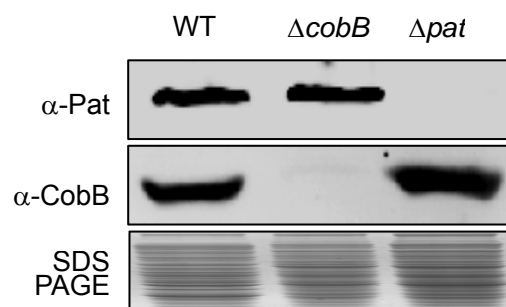

fig. S6. **Specificity of Pat and CobB antibodies.** Prototype,  $\Delta pat$  and  $\Delta cobB$  *S. enterica* strains were grown to mid-log phase in LB and harvested by centrifugation. Cells were lysed and protein levels was determined by SDS PAGE, specificity of anti-Pat and anti-CobB antibodies were determined by detecting presence of Pat and CobB proteins in each cell lysate.

Wang et al, fig. S6



table S1

| Access     | Reference                                                        | Acetylated peptides                     | Z+1 fragments only | All fragments allowed |
|------------|------------------------------------------------------------------|-----------------------------------------|--------------------|-----------------------|
| ACEA_SALTY | Isocitrate lyase                                                 | R.PYSAEEVVK*LRGSVNPECTLAQLGAAK.M        | √                  |                       |
| ACEK_SALTY | Isocitrate dehydrogenase kinase/phosphatase                      | R.NK*AAWLVGK.L                          | √                  |                       |
| ACSA_SALTY | Acetyl-coenzyme A synthetase                                     | K.VKNTSFAPGNVSIK*WYEDGTLNLAANCLDR.H     | √                  |                       |
| ARAB_SALTY | Ribulokinase                                                     | K.VIGTSTCDILIADK*QSVGDRAVK.G            | √                  |                       |
| ARNB_SALTY | UDP-4-amino-4-deoxy-L-arabinose--oxoglutarate aminotransferase   | K.NITCAEGGIVTDNPQFADK*LRSLK.F           | √                  |                       |
| AROK_SALTY | Shikimate kinase 1                                               | R.GVVVYLETTIEK*QLARTQRDKKR.P            | √                  |                       |
| APSL_SALTY | Anaerobic ribonucleoside-triphosphate reductase                  | R.IAGLGK*NR.K                           | √                  |                       |
| CAPP_SALTY | Phosphoenolpyruvate carboxylase                                  | K.LK*NQPDLNDAIK.K                       | √                  |                       |
| CARB_SALTY | Carbamoyl-phosphate synthase large chain                         | R.KGFADARLAK*LAGVRAEIR.K                | √                  |                       |
| CBIK_SALTY | Sirohydrochlorin cobaltochelataase                               | -MK*K*ALLVVSFGTSYHDTCEK.N               | √                  |                       |
| CDH_SALTY  | CDP-diaclyglycerol pyrophosphatase                               | K.K*YGHDIIPDSAVSLAINSR.L                | √                  |                       |
| CHBG_SALTY | UPF0249 protein chbG                                             | R.ELPALGVGMHFVLTLGK*PVSEMPGLTR.D        | √                  |                       |
| CHEY_SALTY | Chemotaxis protein cheY                                          | R.RIVRNLLK*ELGFNNVEEAEDGVDALNK.L        | √                  |                       |
| CISY_SALTY | Citrate synthase                                                 | R.PRQLYTGVDK*RDFK*SALKR                 | √                  |                       |
| CRL_SALTY  | Sigma factor-binding protein crl                                 | K.K*FTALGPYIR.E                         | √                  |                       |
| CYSG_SALTY | Siroheme synthase                                                | R.EAQK*GKR.V                            | √                  |                       |
| CYSJ_SALTY | Sulfite reductase [NADPH] flavoprotein alpha-component           | K.DAPLIATLSVNQK*ITGRNSEK.D              | √                  |                       |
| DCUP_SALTY | Uroporphyrinogen decarboxylase                                   | K.KMMYADPQALHLLLDKLAQ*SVTLYLNAQIK.A     | √                  |                       |
| DGAL_SALTY | D-galactose-binding periplasmic protein precursor (GBP)          | R.KALDSYDK*AYYVGTDSKESGVIQGDIAK.H       | √                  |                       |
| DHAS_SALTY | Aspartate-semialdehyde dehydrogenase                             | K.LKK*EVS IPTVEELLA AHNPWAK.V           | √                  |                       |
| DHSB_SALTY | Succinate dehydrogenase iron-sulfur subunit                      | R.SCREGVCGSDGLNMNGK*NGLACITPISALTQPGK.K | √                  |                       |
| DTI_SALTY  | DNA topoisomerase 3                                              | K.CVIELEIAK*GK.F                        | √                  |                       |
| DNAA_SALTY | Chromosomal replication initiator protein dnaA                   | R.DK*YLNNINGLLNTFCGADAPQLR.F            | √                  |                       |
| DNAB_SALTY | Replicative DNA helicase                                         | R.VFQIAENRANK*DEGPK*SIDQILDATVAR.I      | √                  |                       |
| DUSA_SALTY | tRNA-dihydrouridine synthase A                                   | R.YLSENAHK*AGADVAVLEQALK.L              | √                  |                       |
| EFG_SALTY  | Elongation factor G                                              | K.NK*GVQAMLDAVIDYLPSPVDVPAINGILDDGK.D   | √                  |                       |
| ENO_SALTY  | Enolase                                                          | R.VAK*YNQLIRIEEALGEKAPYNGRK*EIK.G       | √                  |                       |
| FADJ_SALTY | Fatty acid oxidation complex subunit alpha                       | K.LAK*K*QGKTPIVSDKAGFYVNR.I             | √                  |                       |
| FLGM_SALTY | Negative regulator of flagellin synthesis (Anti-sigma-28 factor) | K.TRQEK* TSAATSASVTLSDAQAK.L            | √                  |                       |
| FLIE_SALTY | Flagellar hook-basal body complex protein flIE                   | K.FTLGEPGIALNDVMADMQK*ASVSMQMGIQVR.N    | √                  |                       |
| FUMC_SALTY | Fumarate hydratase class II                                      | R.K*VHPNDDVNK.S                         | √                  |                       |
| G3P1_SALTY | Glyceraldehyde-3-phosphate dehydrogenase                         | K.LVSWYDNETGYSNPK*VLDLIAHISK.-          | √                  |                       |
| G6PI_SALTY | Glucose-6-phosphate isomerase                                    | R.SNTPIIVDGK*DVMPEVNAVLEK.M             | √                  |                       |
| GIDA_SALTY | tRNA uridine 5-carboxymethylaminomethyl modification enzyme      | K.FRAK*AVVLTGTFDVGK.I                   | √                  |                       |
| GLGB_SALTY | 1,4-alpha-glucan-branching enzyme                                | K.TGRK*VGKLECLDARGFFCGVLP.R             | √                  |                       |
| GLK_SALTY  | Glucokinase                                                      | R.AIVKSDNRLPENLRPK*DITER.A              | √                  |                       |
| GLNA_SALTY | Glutamine synthetase                                             | R.FGASISGSHVAIDIEGAWNSSTK*YEGGNK.G      | √                  |                       |
| GLNE_SALTY | Glutamate-ammonia-ligase adenylyltransferase                     | R.ARLAWGMK*AENWPQLVGELTDHMANVR.R        | √                  |                       |
| GPMB_SALTY | Probable phosphoglycerate mutase gpmB                            | R.HYGALQGLNK*AETAEK.Y                   | √                  |                       |

|              |                                                               |                                        |   |
|--------------|---------------------------------------------------------------|----------------------------------------|---|
| HILD_SALTY   | Transcriptional regulator hiiD                                | K.YFK*TTPSTFIK*MANH                    | √ |
| HNS_SALTY    | DNA-binding protein H-NS (Histone-like protein HLP-II)        | R.TRK*LQQYREMLIADGIDPNELLNSMAAAK.S     | √ |
| HSLU_SALTY   | ATP-dependent hsl protease ATP-binding subunit hslU           | K.NILMIGPTGVGK*TEIARR.L                | √ |
| IPYR_SALTY   | Inorganic pyrophosphatase                                     | K.AQITHFFEHYK*DLEKGG.W                 | √ |
| K6PF_SALTY   | 6-phosphofructokinase II                                      | K.PNLK*ELSALVNRDLTQPDDVRK.A            | √ |
| KPRS_SALTY   | Ribose-phosphate pyrophosphokinase                            | -.MPDMK*LFAGNATPELAQR.I                | √ |
| KPYK1_SALTY  | Pyruvate kinase I                                             | K.GVVSQVLVK*EINSTDDFYR.L               | √ |
| KPYK2_SALTY  | Pyruvate kinase II                                            | K.FLLDANLGK*GEGDK*EK.V                 | √ |
| LAMB_SALTY   | Maltoporin precursor (Maltose-inducible porin)                | K.LADGASK*DGWMFTAHTQSMK*GYNK.F         | √ |
| LDCI_SALTY   | Lysine decarboxylase, inducible                               | R.QADGRYTVK*VLK.E                      | √ |
| LEP_SALTY    | Signal peptidase I                                            | R.RARQAAAQTASGDALDNATLNK*VAPK.P        | √ |
| LEPA_SALTY   | GTP-binding protein lepA                                      | R.CSAK*TGVGVTVDVLER.L                  | √ |
| LEU21_SALTY  | 3-isopropylmalate dehydratase large subunit 1                 | K.TLYEK*LFDAHVVFEAPNETPLLYIDR.H        | √ |
| LGUL_SALTY   | Lactoylglutathione lyase                                      | R.EAGPVK*GGSTIIAFVEDPDGYK.I            | √ |
| LUXS_SALTY   | S-ribosylhomocysteine lyase                                   | R.MQAPAVRVAK*TMNTPHGDAITVFDLRFICIPNK.E | √ |
| MDH_SALTY    | Malate dehydrogenase                                          | R.K*PGMDRSDLFNVNAGIVK.N                | √ |
| METN1_SALTY  | Methionine import ATP-binding protein metN 1                  | R.VTELLDLVGLGDKHDSYPANLSGGQK*QR.V      | √ |
| MSGA_SALTY   | Virulence protein msgA                                        | R.EIILNELTK*RVHQLFPDAQVK.V             | √ |
| MURB_SALTY   | UDP-N-acetylenolpyruvoylglucosamine reductase                 | K.VGEK*FNVWLEPEVRFIQR.S                | √ |
| MURE_SALTY   | UDP-N-acetylmuramoyl-L-alanyl-D-glutamate--2,6-diaminopi      | R.AEAVTNAIMQAK*DNDVLIAGK.G             | √ |
| NANH_SALTY   | Sialidase                                                     | K.AEGEHFTDQKGNITIVGSGSGGTTK*YFR.I      | √ |
| NRDR_SALTY   | Transcriptional repressor nrdR                                | R.ATGEREVPKMGIGNLVMEQLK*K*LDK.V        | √ |
| NUSA_SALTY   | Transcription elongation protein nusA (N utilization substanc | R.EK*IFEALESALATATK*K.K                | √ |
| OMPD_SALTY   | Outer membrane porin protein ompD precursor                   | R.TESQGADK*DK*TRLAFAGLK.F              | √ |
| PAGD_SALTY   | Virulence protein pagD precursor                              | K.K*QARQISSPSCPTTK.P                   | √ |
| PEPQ_SALTY   | Xaa-Pro dipeptidase                                           | K.AWVPTQVPNCWLLVDGVNK*PK.L             | √ |
| PGK_SALTY    | Phosphoglycerate kinase                                       | R.FNK*GEKK*DDEALSK*K.Y                 | √ |
| PGM_SALTY    | Phosphoglyceromutase                                          | R.HYGALQGLNK*AETAEK.Y                  | √ |
| PGTB_SALTY   | Phosphoglycerate transport system sensor protein pgtB         | R.QTIDELLEIGMVK*NK.M                   | √ |
| PHSA_SALTY   | Thiosulfate reductase precursor                               | K.VAPTAK*LNKINMPKPTAQR.I               | √ |
| PHSC_SALTY   | Thiosulfate reductase cytochrome B subunit                    | R.CIRQTRFYLFGIMK*GEAHPFVATEQNK.F       | √ |
| PMRD_SALTY   | Signal transduction protein pmrD                              | -.MEWLKSHYVK*K.R                       | √ |
| POTD_SALTY   | Spermidine/putrescine-binding periplasmic protein precursor   | K.IDK*SKLTNFHNLDPPEMLNK.P              | √ |
| PPCK_SALTY   | Phosphoenolpyruvate carboxykinase [ATP]                       | R.DTLWWSDK*GK.G                        | √ |
| PRC_SALTY    | Tail-specific protease precursor                              | K.FDELSLKLTK*SDK.E                     | √ |
| PSD_SALTY    | Phosphatidylserine decarboxylase proenzyme                    | K.ILQAKGHNYSLEALLAGNYLMADK*FR.N        | √ |
| PTGCB_SALTY  | PTS system glucose-specific EIICB component (EIICB-Glc)       | R.VLIKALDLK*TPGREDTDDAK.A              | √ |
| Q7CPQ7_SALTY | fructose/tagatose biphosphate aldolase                        | R.HYMQPAK*QAMK*EVVR.K                  | √ |
| Q8ZK67_SALTY | Fructose-bisphosphatase                                       | K.AALK*ARDIVAGIASEEEDEIVVFEGCEHAK.Y    | √ |
| Q8ZKL4_SALTY | Malate synthase                                               | R.FTPK*RNK*LLAAR.I                     | √ |
| Q8ZRT1_SALTY | Pyruvate dehydrogenase                                        | K.AEGK*SEFAENDAYVHATPLIRRLAR.E         | √ |
| QSEB_SALTY   | Transcriptional regulatory protein qseB                       | K.PK*EFALLELLRNK*GRVLPK.L              | √ |
| QSEC_SALTY   | Sensor protein qseC                                           | R.DK*ALTQLHAGIDR.A                     | √ |

|            |                                                                  |                                      |   |
|------------|------------------------------------------------------------------|--------------------------------------|---|
| RAPA_SALTY | RNA polymerase-associated protein rapA                           | R.IGQAHDIQIHVPYLEK*TAQSVLVR.W        | √ |
| RBFA_SALTY | Ribosome-binding factor A                                        | R.DLAYAKVFVTFLLNDK*DEDAVK*AGIK.A     | √ |
| RDGB_SALTY | Nucleoside-triphosphatase rdgB                                   | K.VVLATGNAGK*VR.E                    | √ |
| RECJ_SALTY | Single-stranded-DNA-specific exonuclease recJ                    | R.KEIEQGMQAEALILCEK*LER.S            | √ |
| RL11_SALTY | 50S ribosomal protein L11                                        | K.AAGIK*SGSGK*PNK.D                  | √ |
| RL14_SALTY | 50S ribosomal protein L14                                        | K.GDVLK*AVVVRTK.K                    | √ |
| RL16_SALTY | 50S ribosomal protein L16                                        | K.VLYEMDGVPEELAREAFK*LAAAK.L         | √ |
| RL2_SALTY  | 50S ribosomal protein L2                                         | K.GKPFAPLVEK*NSK.S                   | √ |
| RL22_SALTY | 50S ribosomal protein L22                                        | -.METIAK*HRHAR.S                     | √ |
| RL23_SALTY | 50S ribosomal protein L23                                        | K.LFEVEVEVVNTLVVK*GK*VK.R            | √ |
| RL29_SALTY | 50S ribosomal protein L29                                        | R.MQAASGQLQQSHLLK*QVRR.D             | √ |
| RL3_SALTY  | 50S ribosomal protein L3                                         | K.KVDVTGTSK*GK.G                     | √ |
| RL35_SALTY | 50S ribosomal protein L35                                        | K.ATK*RK*RHLRPK.A                    | √ |
| RL4_SALTY  | 50S ribosomal protein L4                                         | R.DATGIDPVSLIAFDK*VVMTADAVK.Q        | √ |
| RLUB_SALTY | Ribosomal large subunit pseudouridine synthase B                 | R.EVEREYAVRVFGQVDESK*LRDLR.G         | √ |
| RLUD_SALTY | Ribosomal large subunit pseudouridine synthase D                 | K.EWILNQRVLVNGQLCDK*PK.E             | √ |
| RLUF_SALTY | Ribosomal large subunit pseudouridine synthase F                 | K.SNEK*ARPTSSGK*RFTSPGRK*K*K.G       | √ |
| RP5M_SALTY | Probable sigma(54) modulation protein (ORF95)                    | K.FAK*LEQYFER.I                      | √ |
| RPOD_SALTY | RNA polymerase sigma factor rpoD (Sigma-70)                      | K.AKGRSHAAAQEEILK*LSEVFK.Q           | √ |
| RRF_SALTY  | Ribosome recycling factor (Ribosome-releasing factor) (RRF)      | R.DANDK*VKALLKDK.A                   | √ |
| RS19_SALTY | 30S ribosomal protein S19                                        | K.AVESGDKK*PLR.T                     | √ |
| RS3_SALTY  | 30S ribosomal protein S3                                         | K.PELDAK*LVADSITSQLER.R              | √ |
| SELD_SALTY | Selenide, water dikinase                                         | R.VKK*NSTAQAGCK*LFLTK.P              | √ |
| SILR_SALTY | Probable transcriptional regulatory protein silR                 | K.RLRAK*IDNDYGTKLNQTVR.G             | √ |
| SIPC_SALTY | Cell invasion protein sipC (Effector protein sipC)               | K.LEYK*GLQNERGALK.H                  | √ |
| SIRC_SALTY | Transcriptional regulator sirC                                   | K.VYNIISDLTRK*WSQAEVAGK.L            | √ |
| SODF_SALTY | Superoxide dismutase [Fe]                                        | K.HHQTYYVTNLNLIK*GTAFEGK.S           | √ |
| SPAN_SALTY | Surface presentation of antigens protein spaN                    | K.K*AVEKHKTEYS GDK*KDR.D             | √ |
| SPAS_SALTY | Surface presentation of antigens protein spaS                    | K.EEVKREMKEQEGNPEVK*SKR.R            | √ |
| SSRP_SALTY | SsrA-binding protein                                             | K.K*K*AHK*PGSATIALNKR.A              | √ |
| SUCC_SALTY | Succinyl-CoA synthetase beta chain                               | R.GK*AGGVK*VVK*SK*EEIRAFENWLGK.R     | √ |
| SYC_SALTY  | Cysteinyl-tRNA synthetase                                        | R.NITDIDDK*IIK.R                     | √ |
| SYP_SALTY  | Prolyl-tRNA synthetase                                           | K.AVK*DSK*SPLVALLVRGDHELNEVK.A       | √ |
| SYS_SALTY  | Seryl-tRNA synthetase                                            | R.RGFK*LDVDK*LRALAEERR.K             | √ |
| SYV_SALTY  | Valyl-tRNA synthetase                                            | R.LAK*EVAKIEGEIARIEGK.L              | √ |
| SYW_SALTY  | Tryptophanyl-tRNA synthetase                                     | K.VMK*DGAEK*ASARAAETLKAVYEAIGFVAK.P  | √ |
| SYX_SALTY  | Tyrosyl-tRNA synthetase                                          | R.RLHQNVFGLTVPLITKADGTK*FGK.T        | √ |
| T1M_SALTY  | Type I restriction enzyme StySJI M protein                       | K.FSREWIRSAKSDSLDISWLK*DK.D          | √ |
| T1S_SALTY  | Type I restriction enzyme StySJI specificity protein (S protein) | R.LPK*GESLIAENTGFYIR.A               | √ |
| T200_SALTY | Transposase for insertion sequence element IS200                 | R.K*LCEWK*NVRILEAECCADHIHMLLEIPPK.M  | √ |
| T3RE_SALTY | Type III restriction-modification system StyLTI enzyme           | K.GIDIYYPNLPEEQANNRYIVDSVTAKK*LILR.R | √ |
| TALA_SALTY | Transaldolase A                                                  | R.SPLEPYVVEEDPGVK*SVR.N              | √ |
| TATE_SALTY | Sec-independent protein translocase protein tatE                 | K.LRTLGGDLGTAIK*GFK*K.A              | √ |

|            |                                                              |                                     |   |
|------------|--------------------------------------------------------------|-------------------------------------|---|
| THIH_SALTY | Thiazole biosynthesis protein thiH                           | R.K*LGFEHLLLVTEHQAK.V               | ✓ |
| TILS_SALTY | tRNA(Ile)-lysine synthase                                    | R.FK*APGVLHIVGRNGGRK.L              | ✓ |
| TPIS_SALTY | Triosephosphate isomerase                                    | K.ESEELIAK*K*FAVLK.E                | ✓ |
| TRAT_SALTY | TraT complement resistance protein precursor                 | K.K*LMMVTLVSSTLALSGCGAMSTAIK*K.R    | ✓ |
| TRMD_SALTY | tRNA (guanine-N(1)-)-methyltransferase                       | K.AAAGEGAK*VIYLSPPQGRK.L            | ✓ |
| TRMJ_SALTY | tRNA (cytidine/uridine-2'-O-)-methyltransferase trmJ         | R.LFTRARPESQELNLRGILASIEQQNK*GK     | ✓ |
| TRMU_SALTY | tRNA (5-methylaminomethyl-2-thiouridylate)-methyltransferase | R.KIAEDLGLVTAKK*K.D                 | ✓ |
| TRPB_SALTY | Tryptophan synthase beta chain                               | R.GDK*DIFTVHDILKAR.G                | ✓ |
| TRPR_SALTY | Trp operon repressor                                         | R.ELK*TELGAGIATITR.G                | ✓ |
| TRUD_SALTY | tRNA pseudouridine synthase D                                | R.ILK*NGCNTRFVADALAKFLKIAR.E        | ✓ |
| TYPH_SALTY | Thymidine phosphorylase                                      | K.YLPTAMLSK*AVYADTEGFISAMDTR.A      | ✓ |
| UHPA_SALTY | Transcriptional regulatory protein uhpA                      | R.ANLEK*LGVSNDVELAHR.M              | ✓ |
| UPP_SALTY  | Uracil phosphoribosyltransferase                             | K.HPLVKHK*LGLMRENDISTK.R            | ✓ |
| UPPS_SALTY | Undecaprenyl pyrophosphate synthetase                        | K.KQGK*IRAFGHK*AGAK.S               | ✓ |
| URK_SALTY  | Uridine kinase                                               | R.VK*TNYDHPNAMDHSLLFQHLQALK.R       | ✓ |
| UVRC_SALTY | UvrABC system protein C                                      | K.K*RLSSYFRSNLASR.K                 | ✓ |
| VSDE_SALTY | Virulence protein vsdE                                       | R.INSKNINNDNSNEVK*RIK.D             | ✓ |
| WZC_SALTY  | Tyrosine-protein kinase wzc                                  | K.ALEDEK*AK*LNGRVTAMPK.T            | ✓ |
| YAAI_SALTY | UPF0412 protein yaal precursor                               | K.EGQTTGWINNSDNDNK*R.C              | ✓ |
| YACG_SALTY | UPF0243 zinc-binding protein yacG                            | K.RCQLIDLGEWAAEEK*R.I               | ✓ |
| YAEH_SALTY | UPF0325 protein yaeH                                         | K.SVKFK*YPRQRK*TVVADGIGQGYK.E       | ✓ |
| YBEA_SALTY | UPF0247 protein ybeA                                         | K.RGK*NADIK*RILDK.E                 | ✓ |
| YCAD_SALTY | Uncharacterized MFS-type transporter ycaD                    | R.HSSSISAMLK*LRQAR.L                | ✓ |
| YCEB_SALTY | Uncharacterized lipoprotein yceB precursor                   | R.EEPNK*VTLTRGDARLDMNSLFGSQK*ATMK.L | ✓ |
| YCIA_SALTY | Acyl-CoA thioester hydrolase yciA                            | R.CVK*RGTTSSISINIEVWVK.K            | ✓ |
| YEAH_SALTY | UPF0229 protein yeaH                                         | R.YK*AQIKQSISEAINK*R.S              | ✓ |
| YEDQ_SALTY | Cellulose synthesis regulatory protein                       | R.QRINDKEILVTK*STTLR.I              | ✓ |
| YEEX_SALTY | UPF0265 protein yeeX                                         | -.METTK*PSFQDVLEFVR.L               | ✓ |
| YFCN_SALTY | UPF0115 protein yfcN                                         | K.KK*TSLSEEDQALFRQLMVGTRK.I         | ✓ |
| YFEK_SALTY | Uncharacterized protein yfeK precursor                       | R.INAMLNALAQK*K.D                   | ✓ |
| YFEW_SALTY | UPF0214 protein yfeW precursor                               | K.DMPGDK*IK*GKNK*LR.I               | ✓ |
| YFHR_SALTY | Uncharacterized protein yfhR                                 | R.EPKQK*IFIPDGDHIDAFSGR.Y           | ✓ |
| YGIQ_SALTY | UPF0313 protein ygiQ                                         | R.RQNRNTRPALTK*HTPVEHQRQGLAANK*K.R  | ✓ |
| YICS_SALTY | Uncharacterized protein yicS                                 | K.DLRK*MCTPK*GALTDEAWEK*K.I         | ✓ |
| YIFB_SALTY | Uncharacterized protein yifB                                 | K.K*RVIAAHERQYRRQK.K                | ✓ |
| YIGF_SALTY | Uncharacterized protein yigF                                 | K.DYINDGSLSEK*WK.Y                  | ✓ |
| YIHI_SALTY | UPF0241 protein yihI                                         | R.RK*TREELNQEARDRK*R.L              | ✓ |
| YIIZ_SALTY | Uncharacterized protein yiiZ precursor                       | K.PFQEAQPIYDGLK*NKPRLYGLYQRIQTAK.N  | ✓ |
| YJGA_SALTY | UPF0307 protein yjgA                                         | K.MLRQRDVEPIRQALDK*LK.N             | ✓ |
| YNCE_SALTY | Uncharacterized protein yncE precursor                       | R.LYTTNADGEFIDTASNK*ILSRKK.L        | ✓ |
| YNFC_SALTY | UPF0257 lipoprotein ynfC precursor                           | R.DAQTLEK*KVQLQGK.C                 | ✓ |
| YQFB_SALTY | UPF0267 protein yqfB                                         | R.K*TITIRDASESHFK.A                 | ✓ |
| YSCR_SALTY | Virulence protein yscR                                       | R.QFLQK*NSEEK*EANYFRNLIK.R          | ✓ |

|            |                                                            |                                              |   |
|------------|------------------------------------------------------------|----------------------------------------------|---|
| ZRAR_SALTY | Transcriptional regulatory protein zraR                    | K.EVILAALEK*TGGNK*TEAARQLGITRK*TLLAK.L       | √ |
| YJDB_SALTY | UPF0141 membrane protein yjdB                              | K.HYDEELAHHQEGLLDIIQRAGINVLWNDNDGGCK*GACDR.V | √ |
| ARNC_SALTY | Undecaprenyl-phosphate 4-deoxy-4-formamido-L-arabinose     | R.LVAK*ADEGFDDVVGTVRQNRQDSLFRK.S             | √ |
| CYSD_SALTY | Sulfate adenylyltransferase subunit 2                      | R.QGRMIDRDQAGSMELK*K*R.Q                     | √ |
| IF2_SALTY  | Translation initiation factor IF-2                         | K.AEREAEEQAK*REAAEKAK*REAAEK.D               | √ |
| IF3_SALTY  | Translation initiation factor IF-3                         | R.FLEEGDK*AK*ITLR.F                          | √ |
| MREB_SALTY | Rod shape-determining protein mreB                         | R.IK*HEIGSAYPGDEVREIEVRGRNLAEGVPR.G          | √ |
| PDXH_SALTY | Pyridoxamine 5'-phosphate oxidase                          | R.LADPTAMVVATVDDK*GQPYQRIVLLK*HYDEK.G        | √ |
| SPED_SALTY | S-adenosylmethionine decarboxylase proenzyme               | -MKKLKLGHNLT*SLSFICYDICYAK.T                 | √ |
| SRA_SALTY  | Stationary-phase-induced ribosome-associated protein (SRA) | R.K*VVTEGDTSSVVNNPTGRKRRADSQK                | √ |
| SYT_SALTY  | Threonyl-tRNA synthetase                                   | R.MHELAEKNYDVIK*K*KVSWHDAR.E                 | √ |
| TATA_SALTY | Sec-independent protein translocase protein tatA           | K.K*AMSDDDAKQDKTSQDADFTAK*SIADKQGEAK*K.E     | √ |
| TIG_SALTY  | Trigger factor (TF)                                        | R.VK*GLIEEMASAYEDPKEVIEFYSKNK*ELMDNMR.N      | √ |
| XERC_SALTY | Tyrosine recombinase xerC                                  | R.LSELVGLDIK*HLDLDTGEVWVMGK.G                | √ |
| XGPT_SALTY | Xanthine phosphoribosyltransferase                         | R.LMPSEQWK*GIIAVSR.G                         | √ |
| XNI_SALTY  | Uncharacterized exonuclease xni                            | R.K*KLETHK*EMAFLCRDIARLQTDLHIDGNLQQLR.L      | √ |
| XYLA_SALTY | Xylose isomerase                                           | R.MVEDGELDK*RVAK*RYAGWNGELGQQILK.G           | √ |
| YAJQ_SALTY | UPF0234 protein yajQ                                       | R.AK*LLK*RGIEGASLDVPDEFVHSGK*TWYVEAK*LK.Q    | √ |
| YBAK_SALTY | Uncharacterized protein ybaK                               | K.KVAK*ALGAKKVDMAQPMVAQRRTTGTLVGGISPLGQKKR.L | √ |
| YCFP_SALTY | UPF0227 protein ycfP                                       | R.PEEYADIATKCVTNFREK*NR.D                    | √ |
| YCHJ_SALTY | UPF0225 protein ychJ                                       | K.ENGQWYYIDGTRPQLGRNDPCPCGSGK*K*FK.K         | √ |
| YCIH_SALTY | Uncharacterized protein yciH                               | R.QTSGRK*GK*GVCLITGIEMNDAELTK*LAAELK*K*K.C   | √ |
| YJBB_SALTY | Uncharacterized protein yjbB                               | R.EVLRIGDAMEQMMEGLKKVMHGEPREEK*ALRK.L        | √ |

**table S1. Proteomic identification of acetylated proteins in *S. enterica*.**

Proteins with acetylated peptide(s) qualified by MS analysis with representative acetylated peptide are shown. Positive hits from singly charged fragments search and positive hits of allow both singly charged and mutiply charged fragments search are marked differently. Perspective acetylated lysine residues within the identified peptides are marked by asterisks. Green colored rows are proteins involved in metabolic pathways.

# Pyruvate kinase

#10280-10280 RT:69.09-69.09 NL: 3.41E2

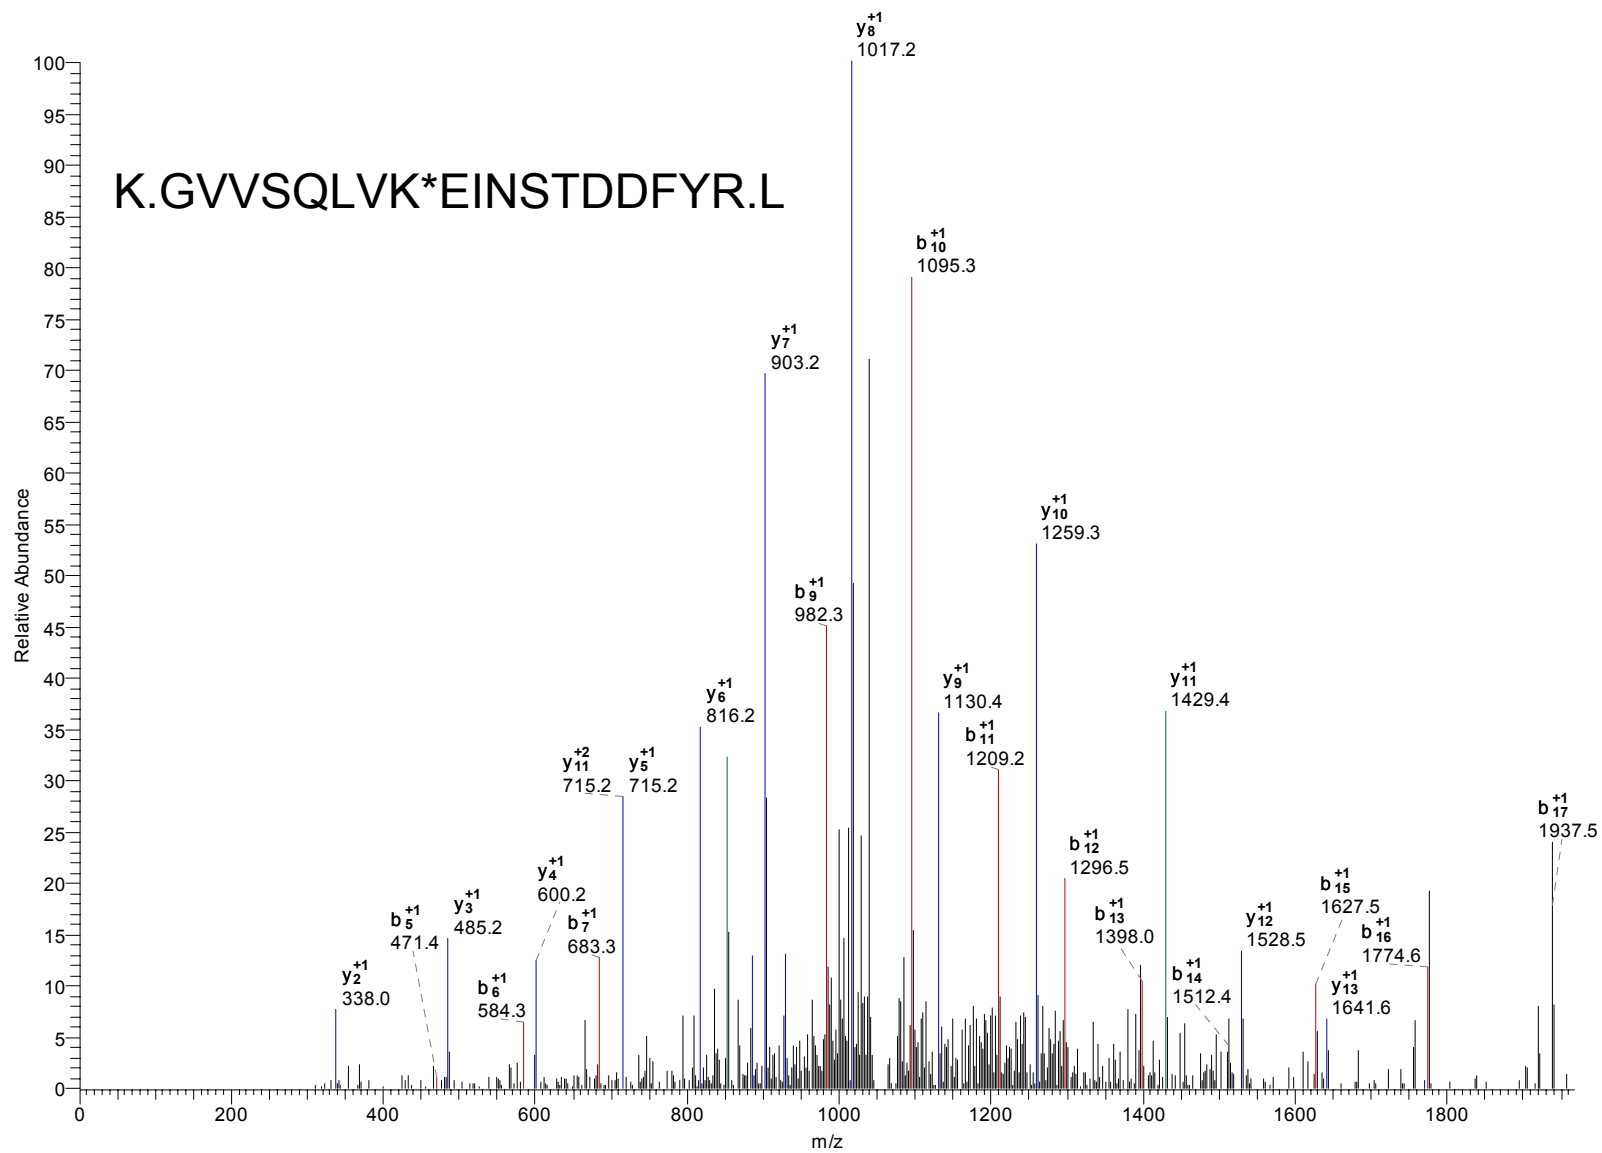

table S2

# Anaerobic ribonucleoside-triphosphate reductase

#21715057-21715057 NL: 3.44E4

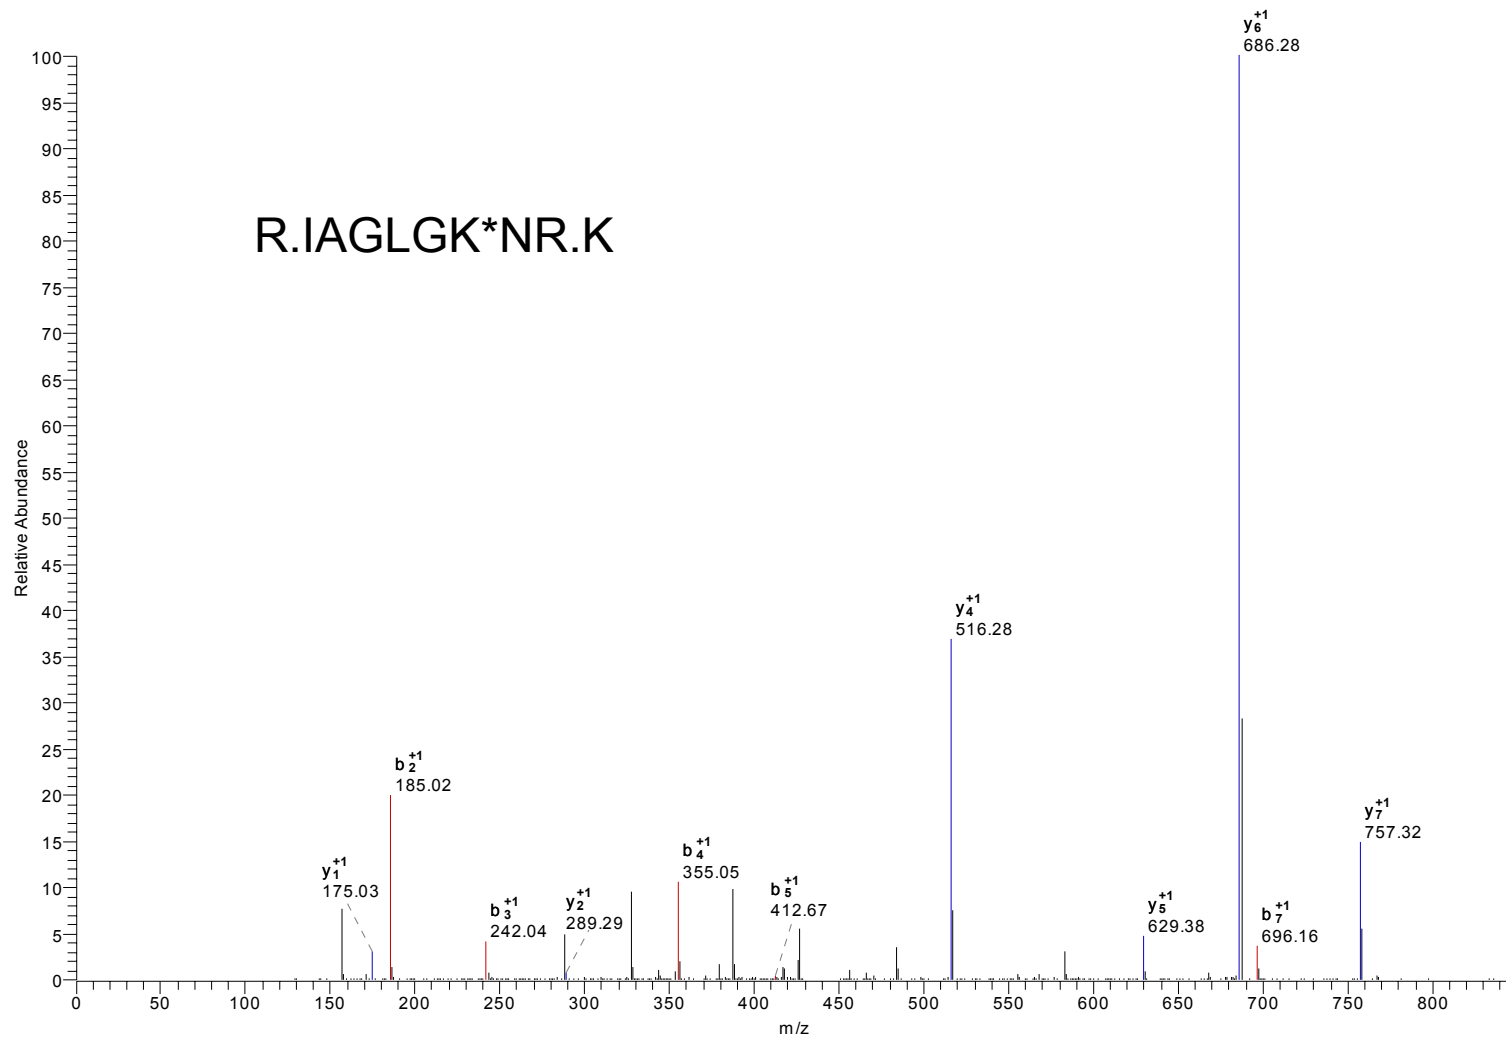

table S2



# Phosphoglyceromutase

#9115-9115 NL: 6.40E2

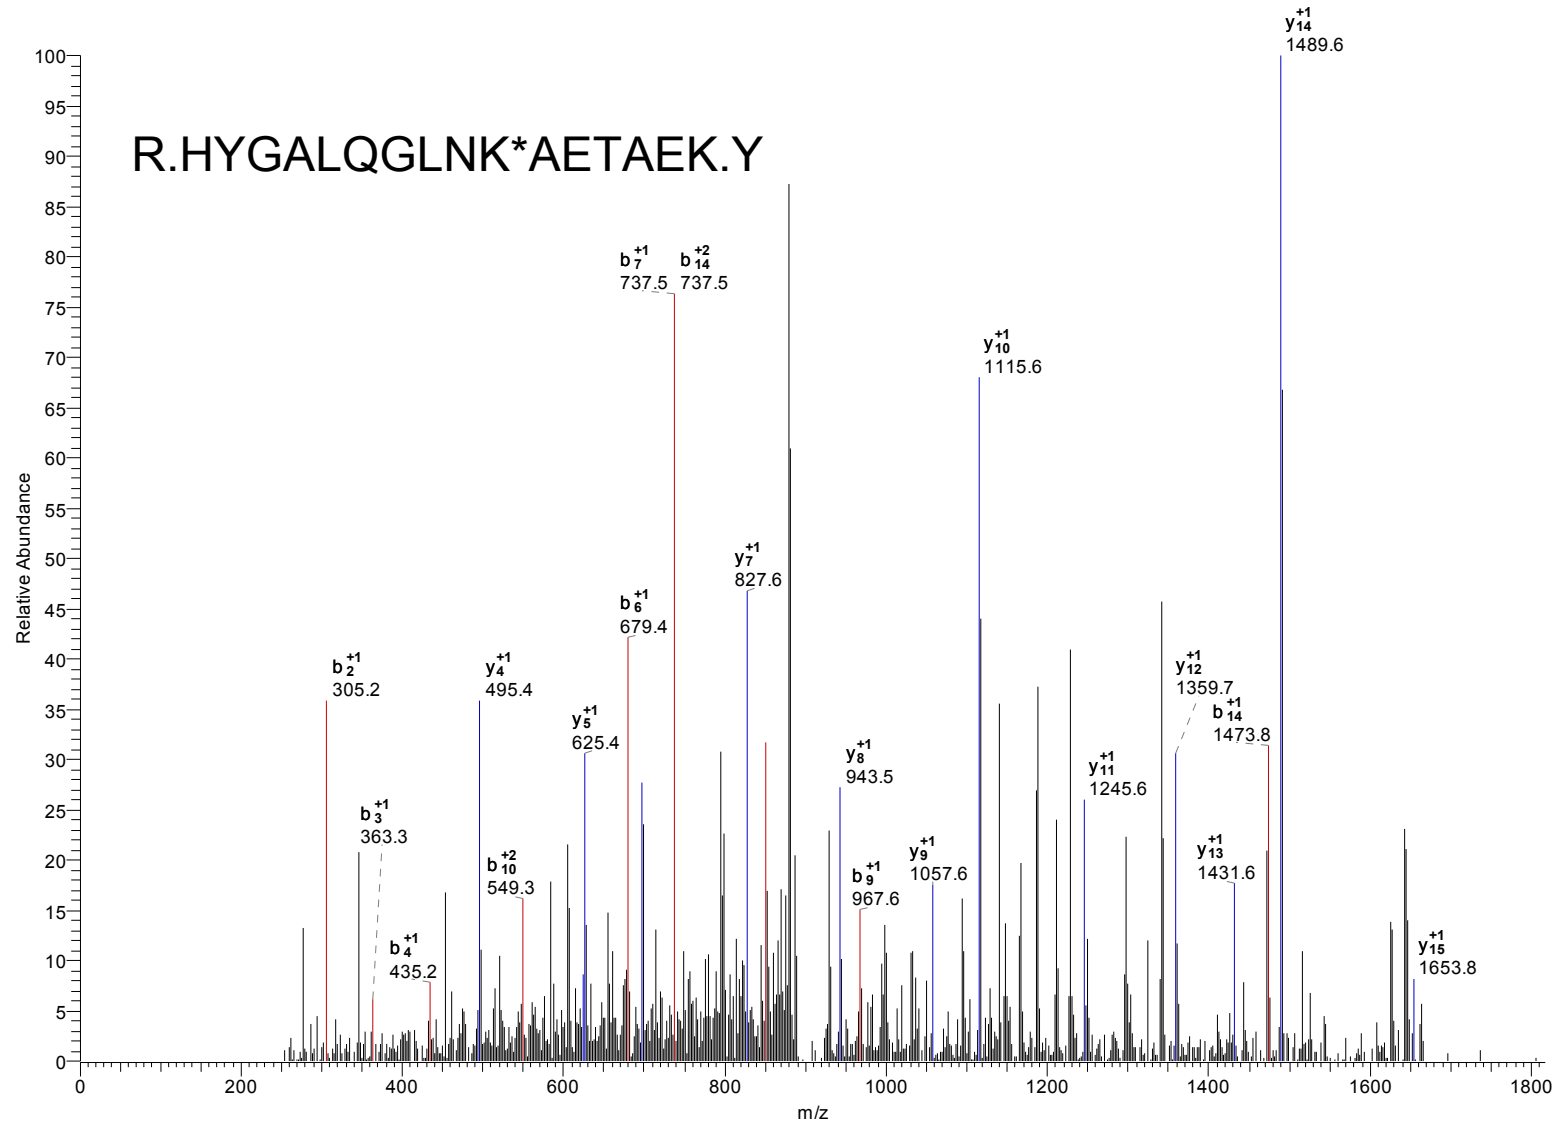

table S2

# Cell invasion protein sipC

#75067747-75067747 NL: 4.50E2

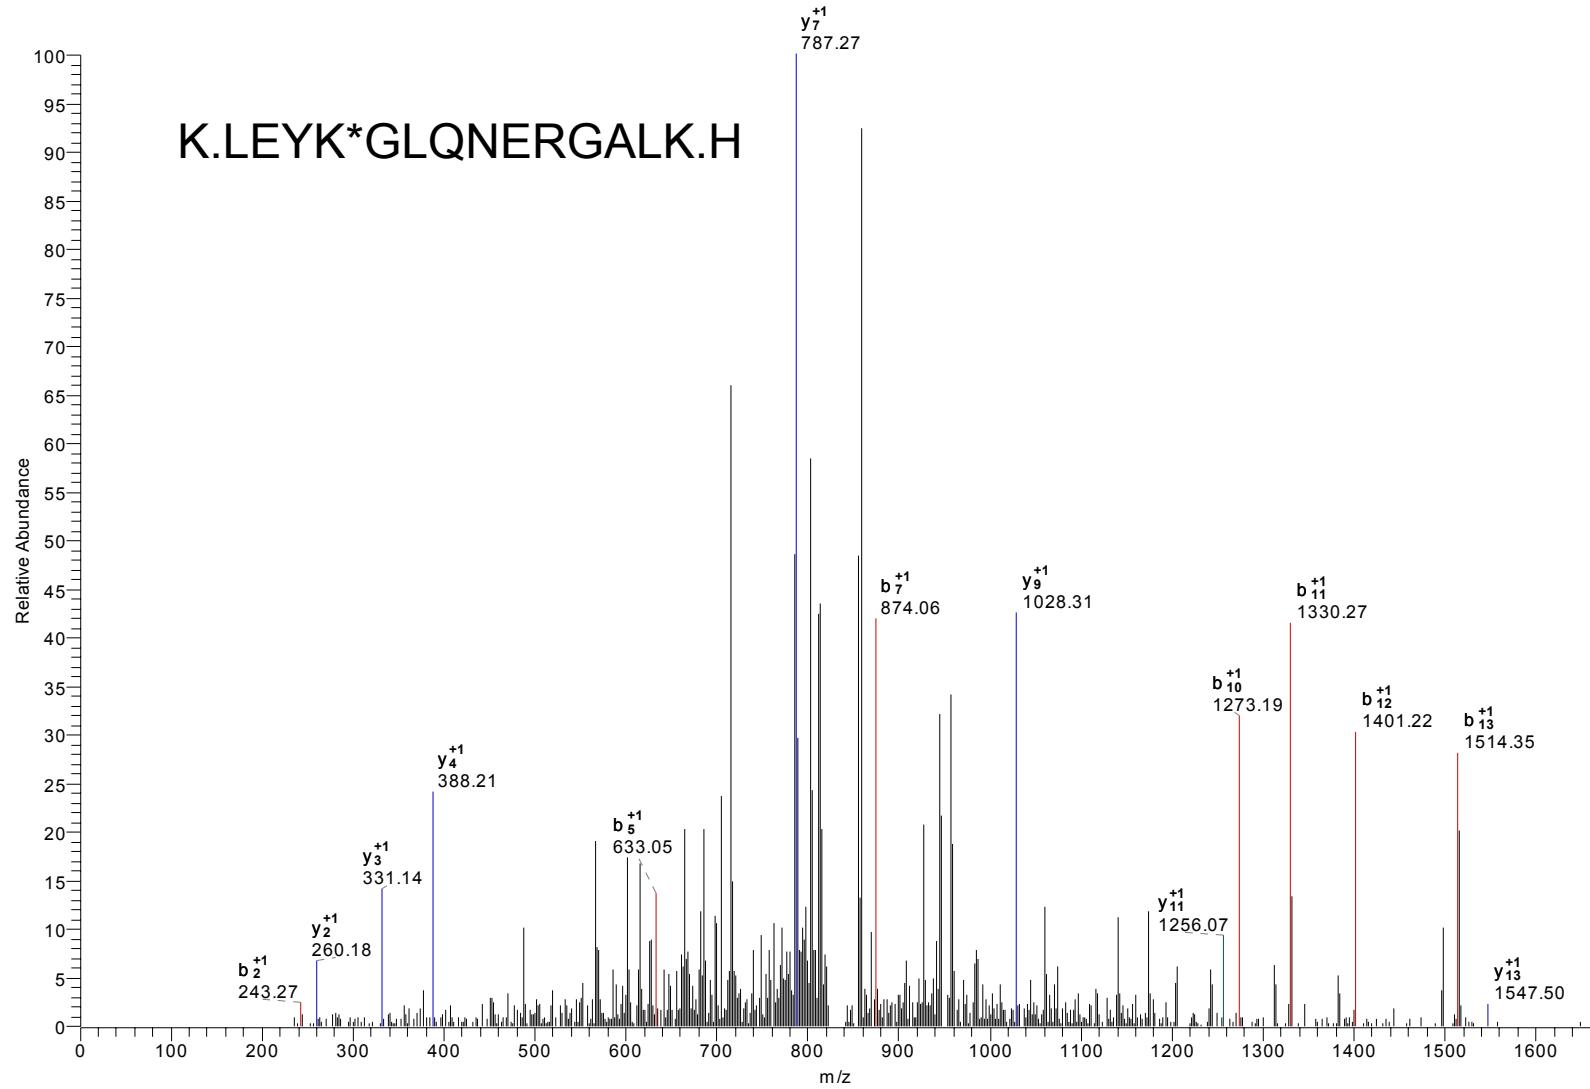

table S2

# DNA topoisomerase 3

#2019911073-2019911073 NL: 1.59E3

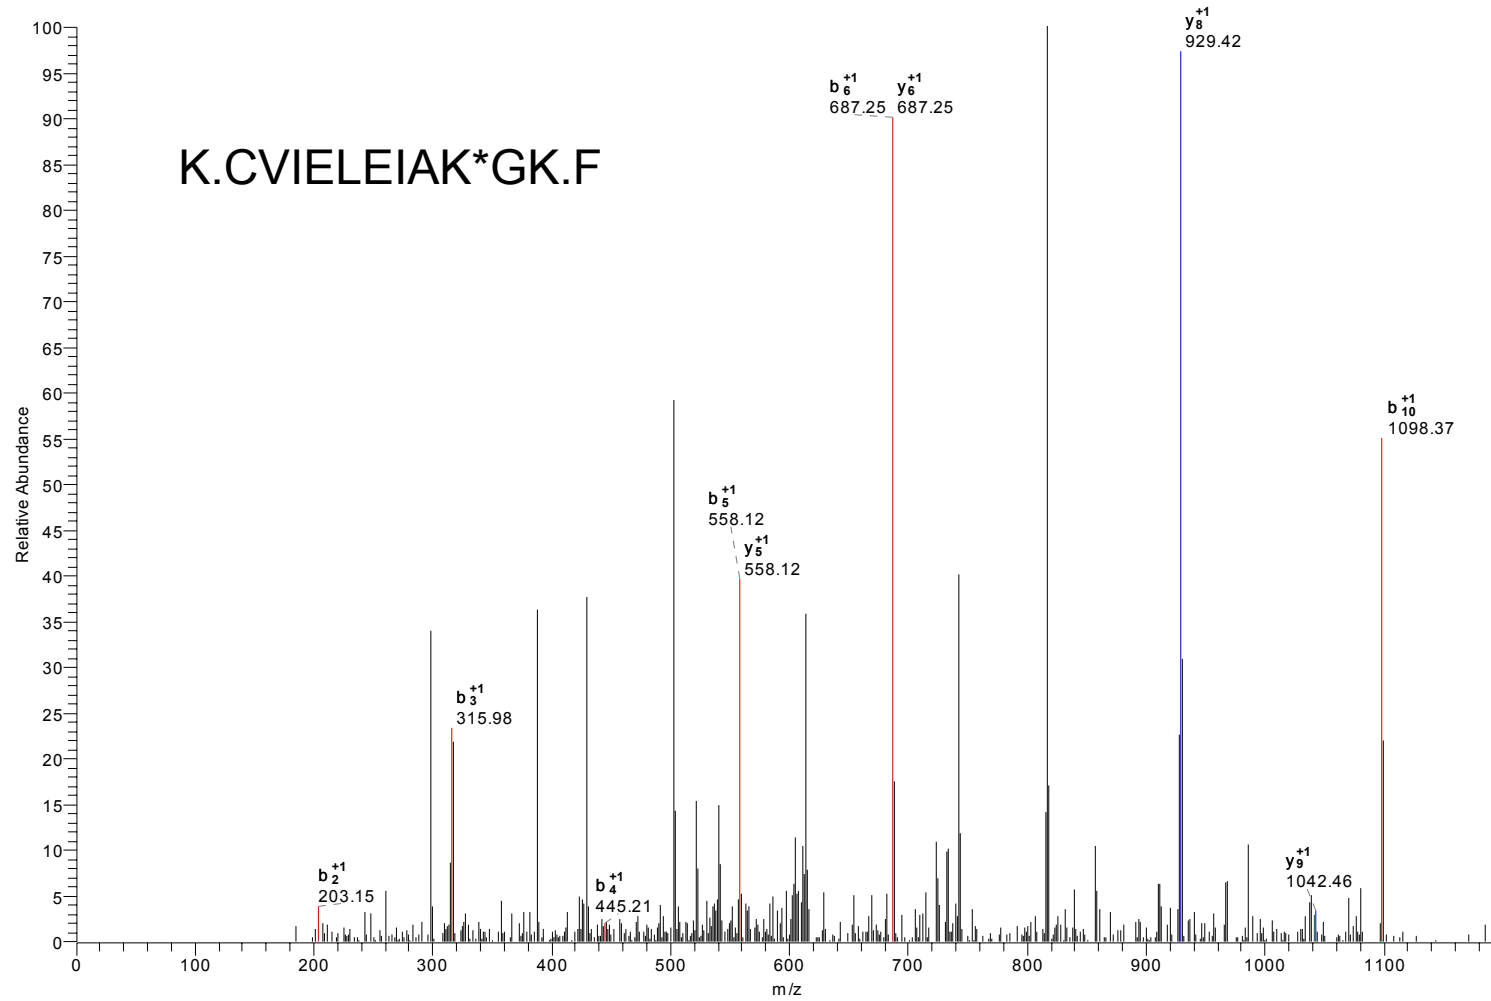

table S2

**table. S2. Examples of MS identification of acetylated peptides from *S. enterica*.** Mass spectra of 5 acetylated peptides from 5 different proteins of *S. enterica* are presented. Perspective acetylated lysine residues are marked.

Wang et al, table. S2

### **Abbreviations for metabolic enzymes shown in Figure 1:**

AceA: Isocitrate Lyase; AceK: Isocitrate Dehydrogenase Kinase/Phosphatase;  
ACO: Aconitase; ACS: Acetyl-CoA Synthetase; AE: Aldose 1-epimerase;  
ALD: Fructose-bisphosphate Aldolase; APase: Acylphosphatase; CS:  
Citrate Synthase; ENL: Enolase; FBPase: Fructose-1,6-bisphosphatase; FH:  
Fumarate Hydratase; GapA: Glyceraldehyde-3-Phosphate Dehydrogenase;  
GK: Glucose Kinase; GPI: Phosphohexose Isomerase; ICDH: Isocitrate  
Dehydrogenase; MDH: Malate Dehydrogenase; MS: Malate Synthase; PDH:  
Pyruvate Dehydrogenase; PEPCase: Phosphoenolpyruvate Carboxylase;  
PEPCK: Phosphoenolpyruvate Carboxykinase; PFK: Phosphofructokinase;  
PGK: Phosphoglycerate Kinase; PGM: Phosphoglycerate Mutase; PK:  
Pyruvate Kinase; PTS: Glucose-Specific Phosphotransferase Enzyme IIA  
Component; SCS: Succinyl-CoA Synthetase; SDH: Succinate Dehydrogenase;  
TPI: Triose Phosphate Isomerase; 50S L4: ribosomal protein 50S L4; 50S L11:  
ribosomal protein 50S L11; 50S L14: ribosomal protein 50S L146; 50S35:  
ribosomal protein 50S L35.

### Supplementary References:

1. Hone, D. *et al*, *J. Infect. Dis.* **156**, 167 (1987).
2. Datsenko, K.A. & Wanner, B.L., *Proc. Natl. Acad. Sci. U S A* **97**, 6640 (2000).
3. Andreev, V.P. *et al*, *J. Proteome Res.* **5**: 2039 (2006).
4. Wu, C.C. *et al*, *Anal. Chem.* **76**: 4951(2004).
5. Zamboni, N., *et al.*, *BCM Bioinformatics.* **6**:209 (2005).
6. Hua, Q. *et al.* *J Bacteriol* **185**:7053 (2003).
7. Chenguang Wang *et al*, *Methods in Molecular Biology* **241**, 207 (2004).
8. Hallows, W.C., *et al*, *Proc Natl. Acad. Sci. U S A* **103**, 10230 (2006).
9. Giachetti *et al*, *E. Experientia* **40** (1984).
10. Kim, J.Y. *et al*, *J. Basic Microbiol.* **42**, 181 (2002).
11. Wolfgang K.G. and Bucher, T., *Eur. J. Biochem.* **17** 568 (1970).
12. Stueland, C.S. *et al*, *J. Biol. Chem.* **263**, 19475 (1988).
